# Supplementary material for: Bacterial Communities Differ among Drosophila melanogaster Populations and Affect Host Resistance against Parasitoids
Source: PLoS One. 2016 Dec 14;11(12):e0167726. doi: 10.1371/journal.pone.0167726 (PMC5156416; doi:10.1371/journal.pone.0167726)
Supplement: S1 Table — (XLSX) [file pone.0167726.s005.xlsx]

## Sheet: Supplement_Table_1
Supplementary Table 1. The primers used in the study.
Name	Sequence	Source	Amplicaon length (bp)
F-968	5’AACGCGAAGAACCTTAC-3’	Nubel et al., 1996	50-900
R-1401	5’-CGGTGTGTAGAAGACCC-3’
F-TATA-box	5’-GTTTGTGTTGTGTTCGACTGC-3’	Vermeulen et al., 2013	148
R-TATA-box	5’-GATGATCTCCCAGAACTTGGC-3’
F-gatB-wAjap	5’-GAA GCA AAG AGG ATG CAA GC-3’	Reumer et al., 2012	73
R-gatB-wAjap	5’-TCC TGGCTT ACC TCA ACA GG-3’
F-16s rRNA	5’-AGAGTTTGATCMTGGCTCAG-3’	Eden et al., 1991	190
R-16s rRNA	5’-ACGGGCGGTGTGTRC-3’
pGEM-t Universal	5`-GTAAAACGACGGCCAGT-3`	pGEM-t Easy Vector system (Promega)
pGEM-t Reverse	5`-GGAAACAGCTATGACCATG-3`
