# Supplementary material for: Bacterial Communities Differ among Drosophila melanogaster Populations and Affect Host Resistance against Parasitoids
Source: PLoS One. 2016 Dec 14;11(12):e0167726. doi: 10.1371/journal.pone.0167726 (PMC5156416; doi:10.1371/journal.pone.0167726)
Supplement: S2 Table — Following line name abbreviations were used: ARL, Arles; BAY, Bayreuth; BRE, Bremen; GOTH, Gotheron; GRO, Groningen; STA, St. Andrews. (XLSX) [file pone.0167726.s006.xlsx]

## Sheet: otu_table_even50.txt
# Constructed from biom file
#OTU ID	bre2	bay2	bre	gro3	sta2	arl3	arl	bay	bre3	gro2	goth	sta	goth3	gro	goth2	taxonomy
denovo0	1	0	0	0	0	0	0	0	0	0	0	0	0	0	0	k__Bacteria; p__Firmicutes; c__Bacilli; o__Bacillales
denovo1	1	0	0	0	0	0	0	0	0	0	0	0	0	0	0	k__Bacteria; p__Proteobacteria; c__Alphaproteobacteria; o__Rhodospirillales; f__Acetobacteraceae
denovo2	0	17	0	0	0	0	0	0	0	0	0	0	0	0	0	k__Bacteria; p__Proteobacteria; c__Alphaproteobacteria; o__Rhodospirillales; f__Acetobacteraceae
denovo3	1	0	0	0	0	0	0	0	0	0	0	0	0	0	0	k__Bacteria; p__Firmicutes; c__Bacilli; o__Lactobacillales; f__Enterococcaceae
denovo4	0	0	6	0	0	0	0	0	0	0	0	0	0	0	0	k__Bacteria; p__Proteobacteria; c__Alphaproteobacteria; o__Rhodospirillales; f__Acetobacteraceae
denovo5	0	0	1	3	1	0	0	0	0	0	0	0	0	0	0	k__Bacteria; p__Proteobacteria; c__Alphaproteobacteria; o__Rhodospirillales; f__Acetobacteraceae; g__Acetobacter; s__
denovo6	0	2	0	0	0	0	0	0	0	0	0	0	0	0	0	k__Bacteria; p__Proteobacteria; c__Alphaproteobacteria; o__Rickettsiales; f__Rickettsiaceae; g__Wolbachia
denovo7	0	1	0	0	0	0	1	0	0	0	0	0	0	0	0	k__Bacteria; p__Proteobacteria; c__Gammaproteobacteria; o__Pseudomonadales; f__Moraxellaceae; g__Acinetobacter
denovo8	0	1	0	0	0	0	0	0	0	0	0	0	0	0	0	k__Bacteria; p__Proteobacteria; c__Alphaproteobacteria; o__Rickettsiales; f__Rickettsiaceae; g__Wolbachia
denovo9	0	0	0	0	0	0	0	1	0	0	0	0	0	0	0	k__Bacteria; p__Firmicutes; c__Clostridia; o__Clostridiales; f__Clostridiaceae; g__Peptoniphilus; s__asaccharolyticus
denovo10	0	1	0	0	0	0	0	0	0	0	0	0	0	0	0	k__Bacteria; p__Proteobacteria; c__Alphaproteobacteria; o__Rhodospirillales; f__Acetobacteraceae; g__Acetobacter; s__
denovo12	0	0	0	0	0	0	1	0	0	0	0	0	0	0	0	k__Bacteria; p__Firmicutes; c__Bacilli; o__Lactobacillales; f__Enterococcaceae; g__Enterococcus
denovo13	0	0	0	0	1	0	0	0	0	0	0	0	0	0	0	k__Bacteria; p__Actinobacteria; c__Actinobacteria; o__Actinomycetales; f__Micrococcaceae; g__Kocuria; s__rhizophila
denovo14	21	0	11	0	0	0	0	0	0	0	0	0	0	0	0	k__Bacteria; p__Firmicutes; c__Bacilli; o__Bacillales; f__Planococcaceae
denovo15	2	0	0	0	0	0	0	0	0	0	0	0	0	0	0	k__Bacteria; p__Proteobacteria; c__Gammaproteobacteria; o__Enterobacteriales; f__Enterobacteriaceae
denovo16	1	0	3	0	0	0	1	0	0	0	0	0	0	0	0	k__Bacteria; p__Firmicutes; c__Bacilli; o__Bacillales; f__Staphylococcaceae; g__Staphylococcus
denovo17	0	0	1	0	0	0	0	0	0	0	0	0	0	0	0	k__Bacteria; p__Firmicutes; c__Bacilli; o__Lactobacillales
denovo18	0	0	5	0	0	0	0	0	0	0	0	0	0	0	0	k__Bacteria; p__Firmicutes; c__Bacilli; o__Bacillales
denovo19	0	0	1	0	0	0	0	0	0	0	0	0	0	0	0	k__Bacteria; p__Firmicutes; c__Bacilli; o__Lactobacillales; f__Enterococcaceae; g__Enterococcus; s__casseliflavus
denovo20	0	0	0	0	0	0	0	0	1	0	0	0	0	0	0	k__Bacteria; p__Firmicutes; c__Bacilli; o__Bacillales; f__Staphylococcaceae; g__Staphylococcus
denovo21	0	0	0	0	0	0	0	0	1	0	0	0	0	0	0	k__Bacteria; p__Firmicutes; c__Bacilli; o__Lactobacillales
denovo22	0	0	0	0	0	0	0	0	0	1	0	0	0	0	0	k__Bacteria; p__Proteobacteria; c__Gammaproteobacteria; o__Pasteurellales; f__Pasteurellaceae
denovo23	0	0	0	0	0	0	2	0	0	0	0	0	0	0	0	k__Bacteria
denovo24	0	0	0	0	0	0	0	0	0	0	1	0	0	0	0	k__Bacteria; p__Proteobacteria; c__Alphaproteobacteria; o__Rhodospirillales; f__Acetobacteraceae; g__Acetobacter; s__
denovo25	0	0	0	0	0	1	0	0	0	0	0	0	0	0	0	k__Bacteria; p__Firmicutes; c__Bacilli; o__Lactobacillales; f__Enterococcaceae
denovo26	0	0	0	0	0	1	1	0	0	0	1	0	3	1	0	k__Bacteria; p__Firmicutes; c__Bacilli; o__Lactobacillales; f__Lactobacillaceae; g__Lactobacillus; s__brevis
denovo27	11	19	4	13	46	30	20	33	16	21	30	46	37	20	16	k__Bacteria; p__Proteobacteria; c__Alphaproteobacteria; o__Rhodospirillales; f__Acetobacteraceae
denovo28	0	0	1	0	0	0	0	0	0	0	0	0	0	0	13	k__Bacteria; p__Proteobacteria; c__Alphaproteobacteria; o__Rhodospirillales; f__Acetobacteraceae
denovo29	0	0	1	0	0	0	0	0	0	0	0	0	0	0	0	k__Bacteria; p__Firmicutes; c__Bacilli; o__Bacillales; f__Staphylococcaceae; g__Staphylococcus
denovo30	0	0	0	0	0	0	0	0	0	0	0	0	0	1	0	k__Bacteria; p__Proteobacteria; c__Alphaproteobacteria
denovo31	0	0	1	0	0	0	0	0	0	0	0	0	0	0	0	k__Bacteria; p__Firmicutes; c__Clostridia; o__Clostridiales; f__Clostridiaceae; g__Clostridium; s__intestinale
denovo32	0	0	0	0	0	0	0	0	0	0	0	0	0	1	0	k__Bacteria; p__Proteobacteria; c__Alphaproteobacteria; o__Rhodospirillales; f__Acetobacteraceae; g__Acetobacter; s__
denovo34	0	0	1	0	0	0	0	0	0	0	0	0	0	0	0	k__Bacteria; p__Actinobacteria; c__Actinobacteria; o__Actinomycetales
denovo35	0	0	0	0	0	0	1	0	0	0	0	0	0	0	0	k__Bacteria; p__Proteobacteria; c__Alphaproteobacteria; o__Rhodospirillales; f__Acetobacteraceae
denovo37	0	0	0	0	0	0	0	0	0	0	2	0	0	0	0	k__Bacteria; p__Proteobacteria; c__Alphaproteobacteria
denovo38	0	0	0	0	0	0	0	1	0	1	0	0	0	0	0	k__Bacteria; p__Proteobacteria; c__Alphaproteobacteria; o__Rickettsiales; f__Rickettsiaceae; g__Wolbachia
denovo39	0	0	0	0	0	0	0	0	0	1	0	0	0	0	0	k__Bacteria; p__Proteobacteria; c__Alphaproteobacteria
denovo40	0	0	0	0	0	0	2	0	0	0	0	0	0	0	0	k__Bacteria; p__Proteobacteria; c__Alphaproteobacteria; o__Rhodospirillales; f__Acetobacteraceae
denovo41	0	0	0	0	0	0	0	0	1	0	0	0	0	0	0	k__Bacteria; p__Proteobacteria; c__Alphaproteobacteria; o__Rhodospirillales; f__Acetobacteraceae
denovo42	0	0	0	0	0	0	0	0	1	0	0	0	0	0	0	k__Bacteria; p__Firmicutes; c__Bacilli; o__Bacillales; f__Planococcaceae; g__Rummeliibacillus
denovo43	0	0	0	0	0	0	0	0	1	0	0	0	0	0	0	k__Bacteria
denovo44	1	0	0	0	0	0	0	0	0	0	0	0	0	0	0	k__Bacteria; p__Firmicutes; c__Bacilli; o__Lactobacillales; f__Enterococcaceae
denovo45	2	0	0	0	0	0	0	0	0	0	0	0	0	0	0	k__Bacteria; p__Firmicutes; c__Bacilli; o__Lactobacillales
denovo46	0	0	0	0	1	0	0	0	0	0	0	0	0	0	0	k__Bacteria; p__Firmicutes; c__Bacilli; o__Lactobacillales
denovo47	1	0	0	0	0	2	2	0	0	1	0	0	1	1	1	k__Bacteria; p__Proteobacteria; c__Alphaproteobacteria; o__Rhodospirillales; f__Acetobacteraceae
denovo48	0	0	0	0	0	0	1	0	0	0	0	0	0	0	0	k__Bacteria; p__Proteobacteria; c__Alphaproteobacteria; o__Rickettsiales; f__Rickettsiaceae; g__Wolbachia; s__
denovo50	0	0	1	0	0	0	0	0	0	0	0	0	0	0	0	k__Bacteria; p__Firmicutes; c__Bacilli; o__Lactobacillales
denovo51	0	0	0	0	0	0	1	0	0	0	0	0	0	0	0	k__Bacteria; p__Proteobacteria; c__Alphaproteobacteria; o__Rhodospirillales; f__Acetobacteraceae
denovo53	0	0	1	0	0	0	0	0	0	0	0	0	0	0	0	k__Bacteria; p__Firmicutes; c__Bacilli; o__Lactobacillales; f__Enterococcaceae; g__Vagococcus; s__
denovo54	1	0	0	1	0	0	1	0	0	5	0	0	0	0	0	k__Bacteria; p__Proteobacteria; c__Alphaproteobacteria; o__Rhodospirillales; f__Acetobacteraceae
denovo55	0	0	0	0	0	0	0	0	0	0	1	0	0	0	0	k__Bacteria; p__Actinobacteria; c__Actinobacteria; o__Actinomycetales; f__Propionibacteriaceae; g__Propionibacterium; s__acnes
denovo57	0	0	0	0	0	0	1	0	0	0	0	0	0	0	0	k__Bacteria; p__Proteobacteria; c__Alphaproteobacteria
denovo58	0	0	0	0	0	0	0	1	0	0	0	0	0	0	0	k__Bacteria; p__Bacteroidetes; c__Bacteroidia; o__Bacteroidales; f__Bacteroidaceae; g__Bacteroides
denovo59	0	0	0	0	0	0	2	0	0	0	0	0	0	0	0	k__Bacteria
denovo60	0	3	5	23	0	12	8	11	1	7	10	0	7	12	12	k__Bacteria; p__Proteobacteria; c__Alphaproteobacteria; o__Rickettsiales; f__Rickettsiaceae; g__Wolbachia; s__
denovo61	0	0	0	0	0	0	0	0	0	0	3	0	1	0	0	k__Bacteria; p__Proteobacteria; c__Alphaproteobacteria; o__Rickettsiales; f__Rickettsiaceae; g__Wolbachia
denovo62	0	0	0	0	0	0	0	0	0	0	0	0	0	1	0	k__Bacteria
denovo63	0	0	0	6	0	0	0	0	0	0	0	0	1	0	0	k__Bacteria; p__Proteobacteria; c__Alphaproteobacteria; o__Rhodospirillales; f__Acetobacteraceae
denovo64	0	1	0	0	0	0	0	0	0	0	0	0	0	0	0	k__Bacteria
denovo65	0	0	0	0	0	0	0	2	0	1	1	0	0	0	0	k__Bacteria; p__Proteobacteria; c__Alphaproteobacteria; o__Rickettsiales
denovo66	0	1	0	0	0	1	0	0	0	0	0	0	0	0	0	k__Bacteria; p__Firmicutes; c__Bacilli; o__Lactobacillales
denovo70	0	0	0	0	0	0	1	0	0	0	0	1	0	0	0	k__Bacteria; p__Firmicutes; c__Bacilli; o__Lactobacillales; f__Leuconostocaceae; g__Weissella; s__
denovo71	2	0	3	0	0	1	0	0	13	9	0	0	0	2	6	k__Bacteria; p__Proteobacteria; c__Alphaproteobacteria; o__Rhodospirillales; f__Acetobacteraceae; g__Acetobacter; s__
denovo72	0	0	0	0	0	0	0	0	1	0	0	0	0	0	0	k__Bacteria; p__Actinobacteria; c__Actinobacteria; o__Actinomycetales; f__Corynebacteriaceae; g__Corynebacterium; s__variabile
denovo73	0	0	0	0	0	0	0	0	1	0	0	0	0	0	0	k__Bacteria; p__Proteobacteria; c__Alphaproteobacteria; o__Rhodospirillales; f__Acetobacteraceae
denovo74	2	0	0	0	0	0	0	0	7	0	0	0	0	0	0	k__Bacteria; p__Firmicutes; c__Bacilli; o__Bacillales; f__Planococcaceae; g__Kurthia; s__gibsonii
denovo76	1	0	0	0	0	0	0	0	0	0	0	0	0	0	0	k__Bacteria; p__Actinobacteria; c__Actinobacteria; o__Actinomycetales; f__Corynebacteriaceae; g__Corynebacterium; s__variabile
denovo77	0	3	2	2	1	2	1	1	1	3	0	1	0	9	1	k__Bacteria; p__Proteobacteria; c__Alphaproteobacteria; o__Rhodospirillales; f__Acetobacteraceae; g__Acetobacter; s__
denovo79	0	0	2	0	0	0	0	0	0	0	0	0	0	0	0	k__Bacteria; p__Proteobacteria; c__Gammaproteobacteria; o__Enterobacteriales; f__Enterobacteriaceae
denovo80	0	0	0	0	0	0	0	0	0	0	1	0	0	0	0	k__Bacteria; p__Proteobacteria; c__Alphaproteobacteria; o__Rhodospirillales; f__Acetobacteraceae
denovo81	0	1	0	2	0	0	2	0	1	0	0	1	0	2	1	k__Bacteria; p__Firmicutes; c__Bacilli; o__Lactobacillales
denovo83	0	0	0	0	0	0	0	0	1	0	0	0	0	0	0	k__Bacteria
denovo84	1	0	0	0	0	0	0	0	3	0	0	1	0	0	0	k__Bacteria; p__Firmicutes; c__Bacilli; o__Bacillales; f__Staphylococcaceae; g__Staphylococcus; s__sciuri
denovo85	0	0	0	0	0	0	1	0	0	0	0	0	0	0	0	k__Bacteria; p__Firmicutes; c__Bacilli; o__Lactobacillales; f__Lactobacillaceae; g__Lactobacillus; s__brevis
denovo86	1	0	0	0	0	0	0	0	0	0	0	0	0	0	0	k__Bacteria; p__Firmicutes; c__Bacilli; o__Bacillales; f__Staphylococcaceae; g__Macrococcus; s__caseolyticus

## Sheet: Sheet1
	arl_22			bay_15			bre_39			gro_17			goth_15			sta_8
denovo27	50		denovo27	52		denovo14	32		denovo27	54		denovo27	83		denovo27	92
denovo60	20		denovo2	17		denovo27	31		denovo60	42		denovo60	29		denovo77	2
denovo47	4		denovo60	14		denovo71	18		denovo77	14		denovo28	13		denovo5	1
denovo77	3		denovo77	4		denovo74	9		denovo71	11		denovo71	6		denovo13	1
denovo23	2		denovo6	2		denovo4	6		denovo54	6		denovo26	4		denovo46	1
denovo26	2		denovo65	2		denovo60	6		denovo63	6		denovo61	4		denovo70	1
denovo40	2		denovo7	1		denovo18	5		denovo81	4		denovo37	2		denovo81	1
denovo59	2		denovo8	1		denovo16	4		denovo5	3		denovo47	2		denovo84	1
denovo81	2		denovo9	1		denovo84	4		denovo47	2		denovo24	1		denovo0	0
denovo7	1		denovo10	1		denovo77	3		denovo22	1		denovo55	1		denovo1	0
denovo12	1		denovo38	1		denovo15	2		denovo26	1		denovo63	1		denovo2	0
denovo16	1		denovo58	1		denovo45	2		denovo30	1		denovo65	1		denovo3	0
denovo25	1		denovo64	1		denovo79	2		denovo32	1		denovo77	1		denovo4	0
denovo35	1		denovo66	1		denovo0	1		denovo38	1		denovo80	1		denovo6	0
denovo48	1		denovo81	1		denovo1	1		denovo39	1		denovo81	1		denovo7	0
denovo51	1		denovo0	0		denovo3	1		denovo62	1		denovo0	0		denovo8	0
denovo54	1		denovo1	0		denovo5	1		denovo65	1		denovo1	0		denovo9	0
denovo57	1		denovo3	0		denovo17	1		denovo0	0		denovo2	0		denovo10	0
denovo66	1		denovo4	0		denovo19	1		denovo1	0		denovo3	0		denovo12	0
denovo70	1		denovo5	0		denovo20	1		denovo2	0		denovo4	0		denovo14	0
denovo71	1		denovo12	0		denovo21	1		denovo3	0		denovo5	0		denovo15	0
denovo85	1		denovo13	0		denovo28	1		denovo4	0		denovo6	0		denovo16	0
denovo0	0		denovo14	0		denovo29	1		denovo6	0		denovo7	0		denovo17	0
denovo1	0		denovo15	0		denovo31	1		denovo7	0		denovo8	0		denovo18	0
denovo2	0		denovo16	0		denovo34	1		denovo8	0		denovo9	0		denovo19	0
denovo3	0		denovo17	0		denovo41	1		denovo9	0		denovo10	0		denovo20	0
denovo4	0		denovo18	0		denovo42	1		denovo10	0		denovo12	0		denovo21	0
denovo5	0		denovo19	0		denovo43	1		denovo12	0		denovo13	0		denovo22	0
denovo6	0		denovo20	0		denovo44	1		denovo13	0		denovo14	0		denovo23	0
denovo8	0		denovo21	0		denovo47	1		denovo14	0		denovo15	0		denovo24	0
denovo9	0		denovo22	0		denovo50	1		denovo15	0		denovo16	0		denovo25	0
denovo10	0		denovo23	0		denovo53	1		denovo16	0		denovo17	0		denovo26	0
denovo13	0		denovo24	0		denovo54	1		denovo17	0		denovo18	0		denovo28	0
denovo14	0		denovo25	0		denovo72	1		denovo18	0		denovo19	0		denovo29	0
denovo15	0		denovo26	0		denovo73	1		denovo19	0		denovo20	0		denovo30	0
denovo17	0		denovo28	0		denovo76	1		denovo20	0		denovo21	0		denovo31	0
denovo18	0		denovo29	0		denovo81	1		denovo21	0		denovo22	0		denovo32	0
denovo19	0		denovo30	0		denovo83	1		denovo23	0		denovo23	0		denovo34	0
denovo20	0		denovo31	0		denovo86	1		denovo24	0		denovo25	0		denovo35	0
denovo21	0		denovo32	0		denovo2	0		denovo25	0		denovo29	0		denovo37	0
denovo22	0		denovo34	0		denovo6	0		denovo28	0		denovo30	0		denovo38	0
denovo24	0		denovo35	0		denovo7	0		denovo29	0		denovo31	0		denovo39	0
denovo28	0		denovo37	0		denovo8	0		denovo31	0		denovo32	0		denovo40	0
denovo29	0		denovo39	0		denovo9	0		denovo34	0		denovo34	0		denovo41	0
denovo30	0		denovo40	0		denovo10	0		denovo35	0		denovo35	0		denovo42	0
denovo31	0		denovo41	0		denovo12	0		denovo37	0		denovo38	0		denovo43	0
denovo32	0		denovo42	0		denovo13	0		denovo40	0		denovo39	0		denovo44	0
denovo34	0		denovo43	0		denovo22	0		denovo41	0		denovo40	0		denovo45	0
denovo37	0		denovo44	0		denovo23	0		denovo42	0		denovo41	0		denovo47	0
denovo38	0		denovo45	0		denovo24	0		denovo43	0		denovo42	0		denovo48	0
denovo39	0		denovo46	0		denovo25	0		denovo44	0		denovo43	0		denovo50	0
denovo41	0		denovo47	0		denovo26	0		denovo45	0		denovo44	0		denovo51	0
denovo42	0		denovo48	0		denovo30	0		denovo46	0		denovo45	0		denovo53	0
denovo43	0		denovo50	0		denovo32	0		denovo48	0		denovo46	0		denovo54	0
denovo44	0		denovo51	0		denovo35	0		denovo50	0		denovo48	0		denovo55	0
denovo45	0		denovo53	0		denovo37	0		denovo51	0		denovo50	0		denovo57	0
denovo46	0		denovo54	0		denovo38	0		denovo53	0		denovo51	0		denovo58	0
denovo50	0		denovo55	0		denovo39	0		denovo55	0		denovo53	0		denovo59	0
denovo53	0		denovo57	0		denovo40	0		denovo57	0		denovo54	0		denovo60	0
denovo55	0		denovo59	0		denovo46	0		denovo58	0		denovo57	0		denovo61	0
denovo58	0		denovo61	0		denovo48	0		denovo59	0		denovo58	0		denovo62	0
denovo61	0		denovo62	0		denovo51	0		denovo61	0		denovo59	0		denovo63	0
denovo62	0		denovo63	0		denovo55	0		denovo64	0		denovo62	0		denovo64	0
denovo63	0		denovo70	0		denovo57	0		denovo66	0		denovo64	0		denovo65	0
denovo64	0		denovo71	0		denovo58	0		denovo70	0		denovo66	0		denovo66	0
denovo65	0		denovo72	0		denovo59	0		denovo72	0		denovo70	0		denovo71	0
denovo72	0		denovo73	0		denovo61	0		denovo73	0		denovo72	0		denovo72	0
denovo73	0		denovo74	0		denovo62	0		denovo74	0		denovo73	0		denovo73	0
denovo74	0		denovo76	0		denovo63	0		denovo76	0		denovo74	0		denovo74	0
denovo76	0		denovo79	0		denovo64	0		denovo79	0		denovo76	0		denovo76	0
denovo79	0		denovo80	0		denovo65	0		denovo80	0		denovo79	0		denovo79	0
denovo80	0		denovo83	0		denovo66	0		denovo83	0		denovo83	0		denovo80	0
denovo83	0		denovo84	0		denovo70	0		denovo84	0		denovo84	0		denovo83	0
denovo84	0		denovo85	0		denovo80	0		denovo85	0		denovo85	0		denovo85	0
denovo86	0		denovo86	0		denovo85	0		denovo86	0		denovo86	0		denovo86	0

## Sheet: Sheet2
arl		bay		bre		gro		goth		sta
denovo27		denovo27		denovo14		denovo27		denovo27		denovo27
denovo60		denovo2		denovo27		denovo60		denovo60		denovo77
denovo47		denovo60		denovo71		denovo77		denovo28		denovo5
denovo77		denovo77		denovo74		denovo71		denovo71		denovo13
denovo23		denovo6		denovo4		denovo54		denovo26		denovo46
denovo26		denovo65		denovo60		denovo63		denovo61		denovo70
denovo40		denovo7		denovo18		denovo81		denovo37		denovo81
denovo59		denovo8		denovo16		denovo5		denovo47		denovo84
denovo81		denovo9		denovo84		denovo47		denovo24
denovo7		denovo10		denovo77		denovo22		denovo55
denovo12		denovo38		denovo15		denovo26		denovo63
denovo16		denovo58		denovo45		denovo30		denovo65
denovo25		denovo64		denovo79		denovo32		denovo77
denovo35		denovo66		denovo0		denovo38		denovo80
denovo48		denovo81		denovo1		denovo39		denovo81
denovo51				denovo3		denovo62
denovo54				denovo5		denovo65
denovo57				denovo17
denovo66				denovo19
denovo70				denovo20
denovo71				denovo21
denovo85				denovo28
				denovo29
				denovo31
				denovo34
				denovo41
				denovo42
				denovo43
				denovo44
				denovo47
				denovo50
				denovo53
				denovo54
				denovo72
				denovo73
				denovo76
				denovo81
				denovo83
				denovo86
