# Supplementary material for: Bacterial Communities Differ among Drosophila melanogaster Populations and Affect Host Resistance against Parasitoids
Source: PLoS One. 2016 Dec 14;11(12):e0167726. doi: 10.1371/journal.pone.0167726 (PMC5156416; doi:10.1371/journal.pone.0167726)
Supplement: S3 Table — (XLSX) [file pone.0167726.s007.xlsx]

## Sheet: Лист1
# Constructed from biom file
#OTU ID	bre2	bay2	bre	gro3	sta2	arl3	arl	bay	arl2	bre3	gro2	goth	sta	goth3	gro	goth2
denovo0	1	0	0	0	0	0	0	0	0	0	0	0	0	0	0	0
denovo1	1	0	0	0	0	0	0	0	0	0	0	0	0	0	0	0
denovo2	0	18	0	0	0	0	0	0	0	0	0	0	0	0	0	0
denovo3	1	0	0	0	0	0	0	0	0	0	0	0	0	0	0	0
denovo4	0	0	6	0	0	0	0	0	0	0	0	0	0	0	0	0
denovo5	0	0	1	3	1	0	0	0	0	0	0	0	0	0	0	0
denovo6	0	2	0	0	0	0	0	0	0	0	0	0	0	0	0	0
denovo7	0	1	0	0	0	1	1	0	0	0	0	0	0	0	0	0
denovo8	0	1	0	0	0	0	0	0	0	0	0	0	0	0	0	0
denovo9	0	0	0	0	0	0	0	1	0	0	0	0	0	0	0	0
denovo10	0	1	0	0	0	0	0	0	0	0	0	0	0	0	0	0
denovo11	0	0	0	0	0	0	0	2	0	0	0	0	0	0	0	0
denovo12	0	0	0	0	0	0	1	0	2	0	0	0	0	0	0	0
denovo13	0	0	0	0	1	0	0	0	0	0	0	0	0	0	0	0
denovo14	29	0	18	0	0	0	0	0	0	0	0	0	0	0	0	0
denovo15	2	0	0	0	0	0	0	0	0	0	0	0	0	0	0	0
denovo16	1	0	3	0	0	0	1	0	0	0	0	0	0	0	0	0
denovo17	0	0	2	0	0	0	0	0	0	0	0	0	0	0	0	0
denovo18	0	0	9	0	0	0	0	0	0	0	0	0	0	0	0	0
denovo19	0	0	1	0	0	0	0	0	0	0	0	0	0	0	0	0
denovo20	0	0	0	0	0	0	0	0	0	2	0	0	0	0	0	0
denovo21	0	0	0	0	0	0	0	0	0	1	0	0	0	0	0	0
denovo22	0	0	0	0	0	0	0	0	0	0	1	0	0	0	0	0
denovo23	0	0	0	0	0	0	2	0	0	0	0	0	0	0	0	0
denovo24	0	0	0	0	0	0	0	0	0	0	0	1	0	0	0	0
denovo25	0	0	0	0	0	1	0	0	0	0	0	0	1	0	0	0
denovo26	0	0	0	0	0	2	1	0	0	0	0	1	0	3	1	0
denovo27	15	19	4	20	56	40	20	55	8	29	32	51	80	41	37	16
denovo28	0	0	1	0	0	0	0	0	0	0	0	0	0	0	0	13
denovo29	0	0	1	0	0	0	0	0	0	0	0	0	0	0	0	0
denovo30	0	0	0	0	0	0	0	0	0	0	0	0	0	0	2	0
denovo31	0	0	1	0	0	0	0	0	0	0	0	0	0	0	0	0
denovo32	0	0	0	0	0	0	0	0	0	0	0	0	0	0	3	0
denovo33	0	0	0	0	0	0	0	0	1	0	0	0	0	0	0	0
denovo34	0	0	1	0	0	0	0	0	0	0	0	0	0	0	0	0
denovo35	0	0	0	0	0	0	1	0	0	0	0	0	0	0	0	0
denovo36	0	0	0	0	0	0	0	0	0	0	0	0	1	0	0	0
denovo37	0	0	0	0	0	0	0	0	0	0	0	2	0	0	0	0
denovo38	0	0	0	0	0	0	0	2	0	0	2	0	0	0	0	0
denovo39	0	0	0	0	0	0	0	0	0	0	1	0	0	0	0	0
denovo40	0	0	0	0	0	0	2	0	0	0	0	0	0	0	0	0
denovo41	0	0	0	0	0	0	0	0	0	1	0	0	0	0	0	0
denovo42	0	0	0	0	0	0	0	0	0	1	0	0	0	0	0	0
denovo43	0	0	0	0	0	0	0	0	0	1	0	0	0	0	0	0
denovo44	1	0	0	0	0	0	0	0	0	0	0	0	0	0	0	0
denovo45	2	0	0	0	0	0	0	0	1	1	0	0	0	0	0	0
denovo46	0	0	0	0	1	0	0	0	0	0	0	0	0	0	0	0
denovo47	1	0	0	0	0	2	2	0	0	0	1	1	0	1	2	1
denovo48	0	0	0	0	0	0	1	0	0	0	0	0	0	0	0	0
denovo49	0	0	1	0	0	0	0	0	0	0	0	0	0	0	0	0
denovo50	0	0	1	0	0	0	0	0	0	0	0	0	0	0	0	0
denovo51	0	0	0	0	0	0	1	0	0	0	0	0	0	0	0	0
denovo52	0	0	0	0	0	0	0	0	12	0	0	0	0	0	0	0
denovo53	0	0	1	0	0	0	0	0	0	0	0	0	0	0	0	0
denovo54	1	0	0	1	0	0	1	0	1	0	8	0	0	0	0	0
denovo55	0	0	0	0	0	0	0	0	0	0	0	2	0	0	0	0
denovo56	0	0	0	0	0	0	0	0	0	0	1	0	0	0	0	0
denovo57	0	0	0	0	0	0	1	0	0	0	0	0	0	0	0	0
denovo58	0	0	0	0	0	0	0	1	0	0	0	0	0	0	0	0
denovo59	0	0	0	0	0	0	2	0	0	0	0	0	0	0	0	0
denovo60	1	3	5	26	0	14	8	19	2	1	10	20	0	8	24	12
denovo61	0	0	0	0	0	0	0	0	0	0	0	3	0	1	0	0
denovo62	0	0	0	0	0	0	0	0	0	0	0	0	0	0	1	0
denovo63	0	0	0	7	0	0	0	0	0	0	0	0	0	1	0	0
denovo64	0	1	0	0	0	0	0	0	0	0	0	0	0	0	0	0
denovo65	0	0	0	0	0	0	0	2	0	0	3	1	0	0	0	0
denovo66	0	1	0	0	0	1	0	0	0	0	0	0	0	0	0	0
denovo67	0	0	0	0	0	0	0	0	0	2	0	0	0	0	0	0
denovo68	0	0	0	0	0	0	0	0	1	0	0	0	0	0	0	0
denovo69	0	0	0	0	0	0	0	0	0	0	1	0	0	0	0	0
denovo70	0	0	0	0	0	0	1	0	0	0	0	0	1	0	0	0
denovo71	2	0	4	0	0	1	0	0	0	16	14	2	0	0	3	6
denovo72	0	0	0	0	0	0	0	0	0	1	0	0	0	0	0	0
denovo73	0	0	0	0	0	0	0	0	0	2	0	0	0	0	0	0
denovo74	2	0	0	0	0	0	0	0	0	9	0	0	0	0	0	0
denovo75	0	0	0	0	0	0	0	0	0	1	0	0	0	0	0	0
denovo76	1	0	0	0	0	0	0	0	0	0	0	0	0	0	0	0
denovo77	1	3	2	3	2	3	1	2	2	1	3	0	2	0	16	1
denovo78	0	0	1	0	0	0	0	0	0	0	0	0	0	0	0	0
denovo79	0	0	2	0	0	0	0	0	0	0	0	0	0	0	0	0
denovo80	0	0	0	0	0	0	0	0	0	0	0	1	0	0	0	0
denovo81	0	1	0	2	0	0	2	0	0	1	0	0	1	0	2	1
denovo82	1	0	0	0	0	0	0	0	0	0	0	0	0	0	0	0
denovo83	0	0	0	0	0	0	0	0	0	1	0	0	0	0	0	0
denovo84	1	0	0	0	0	0	0	0	0	3	0	0	1	0	0	0
denovo85	0	0	0	0	0	0	1	0	0	0	0	0	0	0	0	0
denovo86	1	0	0	0	0	0	0	0	0	0	0	0	0	0	0	0

## Sheet: biom_3
Taxon	bre2	bay2	bre	gro3	sta2	arl3	arl	bay	arl2	bre3	gro2	goth	sta	goth3	gro	goth2
k__Bacteria;Other;Other;Other;Other;Other	0	0.0196078	0	0	0	0	0.08	0	0	0.0405405	0	0	0	0	0.010989	0
k__Bacteria;p__Actinobacteria;c__Actinobacteria;o__Actinomycetales;Other;Other	0	0	0.0153846	0	0	0	0	0	0	0	0	0	0	0	0	0
k__Bacteria;p__Actinobacteria;c__Actinobacteria;o__Actinomycetales;f__Corynebacteriaceae;g__Corynebacterium	0.0153846	0	0.0153846	0	0	0	0	0	0	0.0135135	0	0	0	0	0	0
k__Bacteria;p__Actinobacteria;c__Actinobacteria;o__Actinomycetales;f__Micrococcaceae;g__Kocuria	0	0	0	0	0.0163934	0	0	0	0	0	0	0	0	0	0	0
k__Bacteria;p__Actinobacteria;c__Actinobacteria;o__Actinomycetales;f__Propionibacteriaceae;g__Propionibacterium	0	0	0	0	0	0	0	0	0	0	0	0.0235294	0	0	0	0
k__Bacteria;p__Bacteroidetes;c__Bacteroidia;o__Bacteroidales;f__Bacteroidaceae;g__Bacteroides	0	0	0	0	0	0	0	0.0119048	0	0	0	0	0	0	0	0
k__Bacteria;p__Firmicutes;c__Bacilli;o__Bacillales;Other;Other	0.0307692	0	0.138462	0	0	0	0	0	0	0	0	0	0	0	0	0
k__Bacteria;p__Firmicutes;c__Bacilli;o__Bacillales;f__Planococcaceae;Other	0.446154	0	0.276923	0	0	0	0	0	0	0	0	0	0	0	0	0
k__Bacteria;p__Firmicutes;c__Bacilli;o__Bacillales;f__Planococcaceae;g__Kurthia	0.0307692	0	0	0	0	0	0	0	0	0.121622	0	0	0	0	0	0
k__Bacteria;p__Firmicutes;c__Bacilli;o__Bacillales;f__Planococcaceae;g__Rummeliibacillus	0	0	0	0	0	0	0	0	0	0.0135135	0	0	0	0	0	0
k__Bacteria;p__Firmicutes;c__Bacilli;o__Bacillales;f__Staphylococcaceae;g__Macrococcus	0.0153846	0	0.0153846	0	0	0	0	0	0	0	0	0	0	0	0	0
k__Bacteria;p__Firmicutes;c__Bacilli;o__Bacillales;f__Staphylococcaceae;g__Staphylococcus	0.0307692	0	0.0615385	0	0	0	0.02	0	0	0.0675676	0	0	0.0114943	0	0	0
k__Bacteria;p__Firmicutes;c__Bacilli;o__Lactobacillales;Other;Other	0.0307692	0.0392157	0.0461538	0.0322581	0.0163934	0.0153846	0.04	0	0.0333333	0.0405405	0	0	0.0114943	0	0.021978	0.02
k__Bacteria;p__Firmicutes;c__Bacilli;o__Lactobacillales;f__Enterococcaceae;Other	0.0307692	0	0	0	0	0.0153846	0	0	0.0333333	0	0	0	0.0114943	0	0	0
k__Bacteria;p__Firmicutes;c__Bacilli;o__Lactobacillales;f__Enterococcaceae;g__Enterococcus	0	0	0.0153846	0	0	0	0.02	0	0.0666667	0	0	0	0	0	0	0
k__Bacteria;p__Firmicutes;c__Bacilli;o__Lactobacillales;f__Enterococcaceae;g__Vagococcus	0	0	0.0153846	0	0	0	0	0	0	0	0	0	0	0	0	0
k__Bacteria;p__Firmicutes;c__Bacilli;o__Lactobacillales;f__Lactobacillaceae;g__Lactobacillus	0	0	0	0	0	0.0307692	0.04	0	0	0	0	0.0117647	0	0.0545455	0.010989	0
k__Bacteria;p__Firmicutes;c__Bacilli;o__Lactobacillales;f__Leuconostocaceae;g__Weissella	0	0	0	0	0	0	0.02	0	0	0	0	0	0.0114943	0	0	0
k__Bacteria;p__Firmicutes;c__Bacilli;o__Lactobacillales;f__Streptococcaceae;g__Lactococcus	0	0	0	0	0	0	0	0	0	0.027027	0	0	0	0	0	0
k__Bacteria;p__Firmicutes;c__Clostridia;o__Clostridiales;f__Clostridiaceae;g__Clostridium	0	0	0.0153846	0	0	0	0	0	0	0	0	0	0	0	0	0
k__Bacteria;p__Firmicutes;c__Clostridia;o__Clostridiales;f__Clostridiaceae;g__Peptoniphilus	0	0	0	0	0	0	0	0.0119048	0	0	0	0	0	0	0	0
k__Bacteria;p__Proteobacteria;c__Alphaproteobacteria;Other;Other;Other	0	0	0	0	0	0	0.02	0	0	0	0.012987	0.0235294	0	0	0.021978	0
k__Bacteria;p__Proteobacteria;c__Alphaproteobacteria;o__Rhodospirillales;f__Acetobacteraceae;Other	0.276923	0.72549	0.169231	0.451613	0.918033	0.646154	0.54	0.678571	0.7	0.432432	0.545455	0.623529	0.931034	0.781818	0.428571	0.6
k__Bacteria;p__Proteobacteria;c__Alphaproteobacteria;o__Rhodospirillales;f__Acetobacteraceae;g__Acetobacter	0.0461538	0.0784314	0.107692	0.0967742	0.0491803	0.0615385	0.02	0.0238095	0.0666667	0.22973	0.233766	0.0352941	0.0229885	0	0.241758	0.14
k__Bacteria;p__Proteobacteria;c__Alphaproteobacteria;o__Rickettsiales;Other;Other	0	0	0	0	0	0	0	0.0238095	0	0	0.038961	0.0117647	0	0	0	0
k__Bacteria;p__Proteobacteria;c__Alphaproteobacteria;o__Rickettsiales;f__Rickettsiaceae;g__Wolbachia	0.0153846	0.117647	0.0769231	0.419355	0	0.215385	0.18	0.25	0.1	0.0135135	0.155844	0.270588	0	0.163636	0.263736	0.24
k__Bacteria;p__Proteobacteria;c__Gammaproteobacteria;o__Enterobacteriales;f__Enterobacteriaceae;Other	0.0307692	0	0.0307692	0	0	0	0	0	0	0	0	0	0	0	0	0
k__Bacteria;p__Proteobacteria;c__Gammaproteobacteria;o__Pasteurellales;f__Pasteurellaceae;Other	0	0	0	0	0	0	0	0	0	0	0.012987	0	0	0	0	0
k__Bacteria;p__Proteobacteria;c__Gammaproteobacteria;o__Pseudomonadales;f__Moraxellaceae;g__Acinetobacter	0	0.0196078	0	0	0	0.0153846	0.02	0	0	0	0	0	0	0	0	0
	0.323077	0.803922	0.276923	0.548387	0.967213	0.707692	0.56	0.702381	0.766667	0.662162	0.779221	0.658824	0.954023	0.781818	0.67033	0.74

## Sheet: Лист3
Kingdom	Phylum	Class	Order	Family	Genus	ARL_1	ARL_2	ARL_3	BAY_1	BAY_2	BRE_1	BRE_2	BRE_3	GRO_1	GRO_2	GRO_3	GOTH_1	GOTH_2	GOTH_3	STA_1	STA_2
k__Bacteria	Other	Other	Other	Other	Other	0.08	0	0	0	0.0196078	0	0	0.0405405	0.010989	0	0	0	0	0	0	0
k__Bacteria	p__Actinobacteria	c__Actinobacteria	o__Actinomycetales	Other	Other	0	0	0	0	0	0.0153846	0	0	0	0	0	0	0	0	0	0
k__Bacteria	p__Actinobacteria	c__Actinobacteria	o__Actinomycetales	f__Micrococcaceae	g__Kocuria	0	0	0	0	0	0	0	0	0	0	0	0	0	0	0	0.0163934
k__Bacteria	p__Actinobacteria	c__Actinobacteria	o__Actinomycetales	f__Propionibacteriaceae	g__Propionibacterium	0	0	0	0	0	0	0	0	0	0	0	0.0235294	0	0	0	0
k__Bacteria	p__Bacteroidetes	c__Bacteroidia	o__Bacteroidales	f__Bacteroidaceae	g__Bacteroides	0	0	0	0.0119048	0	0	0	0	0	0	0	0	0	0	0	0
k__Bacteria	p__Firmicutes	c__Bacilli	o__Bacillales	f__Planococcaceae	g__Rummeliibacillus	0	0	0	0	0	0	0	0.0135135	0	0	0	0	0	0	0	0
k__Bacteria	p__Firmicutes	c__Bacilli	o__Lactobacillales	f__Enterococcaceae	g__Enterococcus	0.02	0.0666667	0	0	0	0.0153846	0	0	0	0	0	0	0	0	0	0
k__Bacteria	p__Firmicutes	c__Bacilli	o__Lactobacillales	f__Enterococcaceae	g__Vagococcus	0	0	0	0	0	0.0153846	0	0	0	0	0	0	0	0	0	0
k__Bacteria	p__Firmicutes	c__Bacilli	o__Lactobacillales	f__Lactobacillaceae	g__Lactobacillus	0.04	0	0.0307692	0	0	0	0	0	0.010989	0	0	0.0117647	0	0.0545455	0	0
k__Bacteria	p__Firmicutes	c__Bacilli	o__Lactobacillales	f__Leuconostocaceae	g__Weissella	0.02	0	0	0	0	0	0	0	0	0	0	0	0	0	0.0114943	0
k__Bacteria	p__Firmicutes	c__Bacilli	o__Lactobacillales	f__Streptococcaceae	g__Lactococcus	0	0	0	0	0	0	0	0.027027	0	0	0	0	0	0	0	0
k__Bacteria	p__Firmicutes	c__Clostridia	o__Clostridiales	f__Clostridiaceae	g__Clostridium	0	0	0	0	0	0.0153846	0	0	0	0	0	0	0	0	0	0
k__Bacteria	p__Firmicutes	c__Clostridia	o__Clostridiales	f__Clostridiaceae	g__Peptoniphilus	0	0	0	0.0119048	0	0	0	0	0	0	0	0	0	0	0	0
k__Bacteria	p__Proteobacteria	c__Alphaproteobacteria	Other	Other	Other	0.02	0	0	0	0	0	0	0	0.021978	0.012987	0	0.0235294	0	0	0	0
k__Bacteria	p__Proteobacteria	c__Alphaproteobacteria	o__Rickettsiales	Other	Other	0	0	0	0.0238095	0	0	0	0	0	0.038961	0	0.0117647	0	0	0	0
k__Bacteria	p__Proteobacteria	c__Gammaproteobacteria	o__Pasteurellales	f__Pasteurellaceae	Other	0	0	0	0	0	0	0	0	0	0.012987	0	0	0	0	0	0
k__Bacteria	p__Proteobacteria	c__Gammaproteobacteria	o__Pseudomonadales	f__Moraxellaceae	g__Acinetobacter	0.02	0	0.0153846	0	0.0196078	0	0	0	0	0	0	0	0	0	0	0
k__Bacteria	p__Actinobacteria	c__Actinobacteria	o__Actinomycetales	f__Corynebacteriaceae	g__Corynebacterium	0	0	0	0	0	0.0153846	0.0153846	0.0135135	0	0	0	0	0	0	0	0
k__Bacteria	p__Firmicutes	c__Bacilli	o__Bacillales	f__Staphylococcaceae	g__Macrococcus	0	0	0	0	0	0.0153846	0.0153846	0	0	0	0	0	0	0	0	0
k__Bacteria	p__Proteobacteria	c__Alphaproteobacteria	o__Rickettsiales	f__Rickettsiaceae	g__Wolbachia	0.18	0.1	0.215385	0.25	0.117647	0.0769231	0.0153846	0.0135135	0.263736	0.155844	0.419355	0.270588	0.24	0.163636	0	0
k__Bacteria	p__Firmicutes	c__Bacilli	o__Bacillales	Other	Other	0	0	0	0	0	0.138462	0.0307692	0	0	0	0	0	0	0	0	0
k__Bacteria	p__Firmicutes	c__Bacilli	o__Bacillales	f__Planococcaceae	g__Kurthia	0	0	0	0	0	0	0.0307692	0.121622	0	0	0	0	0	0	0	0
k__Bacteria	p__Firmicutes	c__Bacilli	o__Bacillales	f__Staphylococcaceae	g__Staphylococcus	0.02	0	0	0	0	0.0615385	0.0307692	0.0675676	0	0	0	0	0	0	0.0114943	0
k__Bacteria	p__Firmicutes	c__Bacilli	o__Lactobacillales	Other	Other	0.04	0.0333333	0.0153846	0	0.0392157	0.0461538	0.0307692	0.0405405	0.021978	0	0.0322581	0	0.02	0	0.0114943	0.0163934
k__Bacteria	p__Firmicutes	c__Bacilli	o__Lactobacillales	f__Enterococcaceae	Other	0	0.0333333	0.0153846	0	0	0	0.0307692	0	0	0	0	0	0	0	0.0114943	0
k__Bacteria	p__Proteobacteria	c__Gammaproteobacteria	o__Enterobacteriales	f__Enterobacteriaceae	Other	0	0	0	0	0	0.0307692	0.0307692	0	0	0	0	0	0	0	0	0
k__Bacteria	p__Proteobacteria	c__Alphaproteobacteria	o__Rhodospirillales	f__Acetobacteraceae	g__Acetobacter	0.02	0.0666667	0.0615385	0.0238095	0.0784314	0.107692	0.0461538	0.22973	0.241758	0.233766	0.0967742	0.0352941	0.14	0	0.0229885	0.0491803
k__Bacteria	p__Proteobacteria	c__Alphaproteobacteria	o__Rhodospirillales	f__Acetobacteraceae	Other	0.54	0.7	0.646154	0.678571	0.72549	0.169231	0.276923	0.432432	0.428571	0.545455	0.451613	0.623529	0.6	0.781818	0.931034	0.918033
k__Bacteria	p__Firmicutes	c__Bacilli	o__Bacillales	f__Planococcaceae	Other	0	0	0	0	0	0.276923	0.446154	0	0	0	0	0	0	0	0	0
					Other	0.68	0.766667	0.676923	0.702381	0.784314	0.676923	0.846154	0.513514	0.483516	0.61039	0.483871	0.658824	0.62	0.781818	0.954023	0.934426
	p__Actinobacteria				p__Actinobacteria	0	0	0	0	0	0.0307692	0.0153846	0.0135135	0	0	0	0.0235294	0	0	0	0.0163934
	p__Bacteroidetes				p__Bacteroidetes	0	0	0	0.0119048	0	0	0	0	0	0	0	0	0	0	0	0
	p__Firmicutes				p__Firmicutes	0.14	0.133333	0.0615385	0.0119048	0.0392157	0.584615	0.615385	0.27027	0.032967	0	0.0322581	0.0117647	0.02	0.0545455	0.045977	0.0163934
	p__Proteobacteria				p__Proteobacteria	0.78	0.866667	0.938462	0.97619	0.941176	0.384615	0.369231	0.675676	0.956044	1	0.967742	0.964706	0.98	0.945455	0.954023	0.967213
					Other	0.1	0	0	0	0.0196078	0	0	0.0405405	0.032967	0.012987	0	0.0235294	0	0	0	0
					f__Micrococcaceae	0	0	0	0	0	0	0	0	0	0	0	0	0	0	0	0.0163934
					f__Propionibacteriaceae	0	0	0	0	0	0	0	0	0	0	0	0.0235294	0	0	0	0
					f__Bacteroidaceae	0	0	0	0.0119048	0	0	0	0	0	0	0	0	0	0	0	0
					f__Planococcaceae	0	0	0	0	0	0.276923	0.476923	0.135135	0	0	0	0	0	0	0	0
					f__Enterococcaceae	0.02	0.1	0.0153846	0	0	0.0307692	0.0307692	0	0	0	0	0	0	0	0.0114943	0
					f__Lactobacillaceae	0.04	0	0.0307692	0	0	0	0	0	0.010989	0	0	0.0117647	0	0.0545455	0	0
					f__Leuconostocaceae	0.02	0	0	0	0	0	0	0	0	0	0	0	0	0	0.0114943	0
					f__Streptococcaceae	0	0	0	0	0	0	0	0.027027	0	0	0	0	0	0	0	0
					f__Clostridiaceae	0	0	0	0.0119048	0	0.0153846	0	0	0	0	0	0	0	0	0	0
					f__Pasteurellaceae	0	0	0	0	0	0	0	0	0	0.012987	0	0	0	0	0	0
					f__Moraxellaceae	0.02	0	0.0153846	0	0.0196078	0	0	0	0	0	0	0	0	0	0	0
					f__Corynebacteriaceae	0	0	0	0	0	0.0153846	0.0153846	0.0135135	0	0	0	0	0	0	0	0
					f__Staphylococcaceae	0.02	0	0	0	0	0.0769231	0.0461538	0.0675676	0	0	0	0	0	0	0.0114943	0
					f__Rickettsiaceae	0.18	0.1	0.215385	0.25	0.117647	0.0769231	0.0153846	0.0135135	0.263736	0.155844	0.419355	0.270588	0.24	0.163636	0	0
					Other	0.1	0	0	0.0238095	0.0196078	0.153846	0.0307692	0.0405405	0.032967	0.0519481	0	0.0352941	0	0	0	0
					f__Enterobacteriaceae	0	0	0	0	0	0.0307692	0.0307692	0	0	0	0	0	0	0	0	0
					f__Acetobacteraceae	0.56	0.766667	0.707692	0.702381	0.803922	0.276923	0.323077	0.662162	0.67033	0.779221	0.548387	0.658824	0.74	0.781818	0.954023	0.967213

## Sheet: Graphs
	ARL_1	ARL_2	ARL_3	BAY_1	BAY_2	BRE_1	BRE_2	BRE_3	GRO_1	GRO_2	GRO_3	GOTH_1	GOTH_2	GOTH_3	STA_1	STA_2
p__Actinobacteria	0	0	0	0	0	0.0307692	0.0153846	0.0135135	0	0	0	0.0235294	0	0	0	0.0163934
p__Bacteroidetes	0	0	0	0.0119048	0	0	0	0	0	0	0	0	0	0	0	0
p__Firmicutes	0.14	0.133333	0.0615385	0.0119048	0.0392157	0.584615	0.615385	0.27027	0.032967	0	0.0322581	0.0117647	0.02	0.0545455	0.045977	0.0163934
p__Proteobacteria	0.78	0.866667	0.938462	0.97619	0.941176	0.384615	0.369231	0.675676	0.956044	1	0.967742	0.964706	0.98	0.945455	0.954023	0.967213
Other	0.1	0	0	0	0.0196078	0	0	0.0405405	0.032967	0.012987	0	0.0235294	0	0	0	0
	ARL_1	ARL_2	ARL_3	BAY_1	BAY_2	BRE_1	BRE_2	BRE_3	GRO_1	GRO_2	GRO_3	GOTH_1	GOTH_2	GOTH_3	STA_1	STA_2
f__Micrococcaceae	0	0	0	0	0	0	0	0	0	0	0	0	0	0	0	0.0163934
f__Propionibacteriaceae	0	0	0	0	0	0	0	0	0	0	0	0.0235294	0	0	0	0
f__Bacteroidaceae	0	0	0	0.0119048	0	0	0	0	0	0	0	0	0	0	0	0
f__Planococcaceae	0	0	0	0	0	0.276923	0.476923	0.135135	0	0	0	0	0	0	0	0
f__Enterococcaceae	0.02	0.1	0.0153846	0	0	0.0307692	0.0307692	0	0	0	0	0	0	0	0.0114943	0
f__Lactobacillaceae	0.04	0	0.0307692	0	0	0	0	0	0.010989	0	0	0.0117647	0	0.0545455	0	0
f__Leuconostocaceae	0.02	0	0	0	0	0	0	0	0	0	0	0	0	0	0.0114943	0
f__Streptococcaceae	0	0	0	0	0	0	0	0.027027	0	0	0	0	0	0	0	0
f__Clostridiaceae	0	0	0	0.0119048	0	0.0153846	0	0	0	0	0	0	0	0	0	0
f__Pasteurellaceae	0	0	0	0	0	0	0	0	0	0.012987	0	0	0	0	0	0
f__Moraxellaceae	0.02	0	0.0153846	0	0.0196078	0	0	0	0	0	0	0	0	0	0	0
f__Corynebacteriaceae	0	0	0	0	0	0.0153846	0.0153846	0.0135135	0	0	0	0	0	0	0	0
f__Staphylococcaceae	0.02	0	0	0	0	0.0769231	0.0461538	0.0675676	0	0	0	0	0	0	0.0114943	0
f__Rickettsiaceae	0.18	0.1	0.215385	0.25	0.117647	0.0769231	0.0153846	0.0135135	0.263736	0.155844	0.419355	0.270588	0.24	0.163636	0	0
Other	0.1	0	0	0.0238095	0.0196078	0.153846	0.0307692	0.0405405	0.032967	0.0519481	0	0.0352941	0	0	0	0
f__Enterobacteriaceae	0	0	0	0	0	0.0307692	0.0307692	0	0	0	0	0	0	0	0	0
f__Acetobacteraceae	0.56	0.766667	0.707692	0.702381	0.803922	0.276923	0.323077	0.662162	0.67033	0.779221	0.548387	0.658824	0.74	0.781818	0.954023	0.967213
	0.96
	ARL_1	ARL_2	ARL_3	BAY_1	BAY_2	BRE_1	BRE_2	BRE_3	GRO_1	GRO_2	GRO_3	GOTH_1	GOTH_2	GOTH_3	STA_1	STA_2
g__Kocuria	0	0	0	0	0	0	0	0	0	0	0	0	0	0	0	0.0163934
g__Propionibacterium	0	0	0	0	0	0	0	0	0	0	0	0.0235294	0	0	0	0
g__Bacteroides	0	0	0	0.0119048	0	0	0	0	0	0	0	0	0	0	0	0
g__Rummeliibacillus	0	0	0	0	0	0	0	0.0135135	0	0	0	0	0	0	0	0
g__Enterococcus	0.02	0.0666667	0	0	0	0.0153846	0	0	0	0	0	0	0	0	0	0
g__Vagococcus	0	0	0	0	0	0.0153846	0	0	0	0	0	0	0	0	0	0
g__Lactobacillus	0.04	0	0.0307692	0	0	0	0	0	0.010989	0	0	0.0117647	0	0.0545455	0	0
g__Weissella	0.02	0	0	0	0	0	0	0	0	0	0	0	0	0	0.0114943	0
g__Lactococcus	0	0	0	0	0	0	0	0.027027	0	0	0	0	0	0	0	0
g__Clostridium	0	0	0	0	0	0.0153846	0	0	0	0	0	0	0	0	0	0
g__Peptoniphilus	0	0	0	0.0119048	0	0	0	0	0	0	0	0	0	0	0	0
g__Acinetobacter	0.02	0	0.0153846	0	0.0196078	0	0	0	0	0	0	0	0	0	0	0
g__Corynebacterium	0	0	0	0	0	0.0153846	0.0153846	0.0135135	0	0	0	0	0	0	0	0
g__Macrococcus	0	0	0	0	0	0.0153846	0.0153846	0	0	0	0	0	0	0	0	0
g__Wolbachia	0.18	0.1	0.215385	0.25	0.117647	0.0769231	0.0153846	0.0135135	0.263736	0.155844	0.419355	0.270588	0.24	0.163636	0	0
g__Kurthia	0	0	0	0	0	0	0.0307692	0.121622	0	0	0	0	0	0	0	0
g__Staphylococcus	0.02	0	0	0	0	0.0615385	0.0307692	0.0675676	0	0	0	0	0	0	0.0114943	0
g__Acetobacter	0.02	0.0666667	0.0615385	0.0238095	0.0784314	0.107692	0.0461538	0.22973	0.241758	0.233766	0.0967742	0.0352941	0.14	0	0.0229885	0.0491803
Other	0.68	0.766667	0.676923	0.702381	0.784314	0.676923	0.846154	0.513514	0.483516	0.61039	0.483871	0.658824	0.62	0.781818	0.954023	0.934426

## Sheet: Supplementary_Table_3
groups_significance.py
Shannon
ANOVA
	SS	df	MS	F	p
Between:	8021	5	1604	5916	0.011
Within:	2440	9	0.271
Total:	10461	14
PD
ANOVA
	SS	df	MS	F	p
Between:	0.678	5	0.136	10554	0.001
Within:	0.116	9	0.013
Total:	0.794	14
