# Supplementary material for: Bacterial Communities Differ among Drosophila melanogaster Populations and Affect Host Resistance against Parasitoids
Source: PLoS One. 2016 Dec 14;11(12):e0167726. doi: 10.1371/journal.pone.0167726 (PMC5156416; doi:10.1371/journal.pone.0167726)
Supplement: S4 Table — (XLSX) [file pone.0167726.s008.xlsx]

## Sheet: R_data
Line	Treatment	Line_T	Sample	Pupae	Flies	FliesCaps	Wasps
GOTH	C	GOTH_C	C1	46	33	17	6
GOTH	C	GOTH_C	C2	52	27	15	1
GOTH	C	GOTH_C	C3	52	33	17	3
GOTH	C	GOTH_C	C4	47	39	16	2
GOTH	C	GOTH_C	C5	50	31	15	10
GOTH	C	GOTH_C	C6	57	41	19	2
GOTH	C	GOTH_C	C7	49	19	12	1
GOTH	C	GOTH_C	C8	46	26	11	4
GOTH	C	GOTH_C	C9	48	22	9	7
GOTH	C	GOTH_C	C10	45	15	9	3
GOTH	T	GOTH_T	T1	42	26	21	2
GOTH	T	GOTH_T	T2	45	31	17	4
GOTH	T	GOTH_T	T3	54	32	21	1
GOTH	T	GOTH_T	T4	47	24	16	1
GOTH	T	GOTH_T	T5	44	26	16	3
GOTH	T	GOTH_T	T6	47	33	24	0
GOTH	T	GOTH_T	T7	41	20	13	0
GOTH	T	GOTH_T	T8	58	28	22	2
GOTH	T	GOTH_T	T9	47	32	20	0
GOTH	T	GOTH_T	T10	49	24	19	1
GOTH	T	GOTH_T	T1	41	31	7	0
GOTH	T	GOTH_T	T2	46	24	15	8
GOTH	T	GOTH_T	T3	30	17	9	1
GOTH	T	GOTH_T	T5	27	16	6	0
GOTH	T	GOTH_T	T6	37	19	14	0
GOTH	T	GOTH_T	T7	58	31	22	4
GOTH	T	GOTH_T	T8	52	13	12	5
GOTH	T	GOTH_T	T9	49	29	19	3
GOTH	T	GOTH_T	T10	73	71	5	0
STA	C	STA_C	C1	67	26	12	12
STA	C	STA_C	C2	61	19	15	6
STA	C	STA_C	C3	63	13	9	2
STA	C	STA_C	C5	67	31	16	4
STA	C	STA_C	C6	50	11	10	4
STA	C	STA_C	C7	87	6	5	15
STA	C	STA_C	C8	92	18	14	0
STA	C	STA_C	C9	65	4	4	15
STA	C	STA_C	C10	83	12	7	11
STA	T	STA_T	T2	77	2	1	24
STA	T	STA_T	T3	86	18	10	9
STA	T	STA_T	T4	86	10	6	9
STA	T	STA_T	T5	76	5	5	7
STA	T	STA_T	T6	65	11	11	9
STA	T	STA_T	T8	97	7	5	14
STA	T	STA_T	T9	70	41	16	11
STA	T	STA_T	T10	98	63	11	9
STA	T	STA_T	T1	92	23	8	11
STA	T	STA_T	T2	93	18	4	51
STA	T	STA_T	T3	92	31	13	27
STA	T	STA_T	T5	97	8	5	19
STA	T	STA_T	T6	92	6	3	4
STA	T	STA_T	T7	94	27	13	3
STA	T	STA_T	T8	98	9	8	20
STA	T	STA_T	T9	92	31	10	15
STA	T	STA_T	T10	94	19	6	46
GRO	C	GRO_C	C1	38	24	4	1
GRO	C	GRO_C	C2	49	29	3	9
GRO	C	GRO_C	C3	56	17	5	9
GRO	C	GRO_C	C7	57	6	2	14
GRO	C	GRO_C	C8	45	20	1	3
GRO	C	GRO_C	C9	59	11	5	12
GRO	C	GRO_C	C10	56	5	4	26
GRO	T	GRO_T	T1	58	10	7	21
GRO	T	GRO_T	T2	53	27	13	4
GRO	T	GRO_T	T3	55	20	5	7
GRO	T	GRO_T	T4	52	20	10	4
GRO	T	GRO_T	T5	52	11	4	3
GRO	T	GRO_T	T6	47	15	9	16
GRO	T	GRO_T	T7	50	19	4	2
GRO	T	GRO_T	T8	58	13	7	15
GRO	T	GRO_T	T9	59	27	2	5
GRO	T	GRO_T	T10	69	22	0	5
GRO	T	GRO_T	T1	42	13	3	6
GRO	T	GRO_T	T4	40	11	4	6
GRO	T	GRO_T	T5	46	20	3	2
GRO	T	GRO_T	T6	48	17	8	4
GRO	T	GRO_T	T7	41	16	3	9
GRO	T	GRO_T	T9	38	10	7	7
GRO	T	GRO_T	T10	50	11	4	10
ARL	C	ARL_C	C1	94	11	7	34
ARL	C	ARL_C	C2	89	15	11	15
ARL	C	ARL_C	C3	77	11	5	36
ARL	C	ARL_C	C4	98	23	11	15
ARL	C	ARL_C	C5	73	20	7	19
ARL	C	ARL_C	C6	97	40	9	9
ARL	C	ARL_C	C7	97	46	9	22
ARL	C	ARL_C	C8	77	21	9	19
ARL	C	ARL_C	C9	74	6	4	12
ARL	C	ARL_C	C10	84	6	4	10
ARL	T	ARL_T	T1	97	22	6	2
ARL	T	ARL_T	T2	92	32	12	2
ARL	T	ARL_T	T4	NA	102	7	19
ARL	T	ARL_T	T5	84	30	0	1
ARL	T	ARL_T	T6	83	64	7	15
ARL	T	ARL_T	T7	97	9	4	12
ARL	T	ARL_T	T8	99	5	6	30
ARL	T	ARL_T	T9	95	7	12	12
ARL	T	ARL_T	T10	96	14	3	0
ARL	T	ARL_T	T1	97	3	18	7
ARL	T	ARL_T	T2	94	37	7	34
ARL	T	ARL_T	T3	95	11	12	18
ARL	T	ARL_T	T4	94	60	6	20
ARL	T	ARL_T	T5	97	22	4	14
ARL	T	ARL_T	T6	95	35	7	4
ARL	T	ARL_T	T7	103	38	10	4
ARL	T	ARL_T	T8	NA	69	6	45
ARL	T	ARL_T	T9	94	37	3	20
ARL	T	ARL_T	T10	109	12	5	23
BRE	C	BRE_C	C1	46	20	6	2
BRE	C	BRE_C	C2	73	39	15	1
BRE	C	BRE_C	C4	65	17	9	9
BRE	C	BRE_C	C5	59	5	2	13
BRE	C	BRE_C	C6	70	29	7	20
BRE	C	BRE_C	C7	59	17	5	3
BRE	C	BRE_C	C8	73	18	4	13
BRE	C	BRE_C	C9	62	18	5	19
BRE	C	BRE_C	C10	60	13	7	12
BRE	T	BRE_T	T1	48	10	5	3
BRE	T	BRE_T	T2	40	9	4	6
BRE	T	BRE_T	T3	53	5	3	12
BRE	T	BRE_T	T5	65	10	5	0
BRE	T	BRE_T	T6	47	15	4	3
BRE	T	BRE_T	T7	59	1	1	17
BRE	T	BRE_T	T8	58	4	2	16
BRE	T	BRE_T	T9	49	6	4	9
BRE	T	BRE_T	T10	74	20	4	10
BRE	T	BRE_T	T1	81	24	4	1
BRE	T	BRE_T	T2	59	24	1	3
BRE	T	BRE_T	T4	53	8	5	6
BRE	T	BRE_T	T5	71	10	5	7
BRE	T	BRE_T	T6	67	5	1	14
BRE	T	BRE_T	T7	66	2	1	8
BRE	T	BRE_T	T8	58	3	2	18
BRE	T	BRE_T	T9	73	21	12	8
BRE	T	BRE_T	T10	63	10	3	20
BAY	C	BAY_C	C1	74	12	8	12
BAY	C	BAY_C	C2	45	18	8	2
BAY	C	BAY_C	C3	59	20	10	20
BAY	C	BAY_C	C4	63	54	17	0
BAY	C	BAY_C	C5	79	23	10	18
BAY	C	BAY_C	C6	77	31	19	4
BAY	C	BAY_C	C7	67	31	9	3
BAY	C	BAY_C	C8	69	33	15	4
BAY	C	BAY_C	C9	71	16	10	9
BAY	C	BAY_C	C10	66	36	17	4
BAY	T	BAY_T	T1	52	24	11	1
BAY	T	BAY_T	T2	50	13	8	0
BAY	T	BAY_T	T3	53	18	8	4
BAY	T	BAY_T	T4	54	8	3	6
BAY	T	BAY_T	T5	52	24	7	4
BAY	T	BAY_T	T6	49	34	17	0
BAY	T	BAY_T	T7	42	16	5	1
BAY	T	BAY_T	T8	58	46	5	3
BAY	T	BAY_T	T9	65	19	10	7
BAY	T	BAY_T	T10	63	18	9	8
BAY	T	BAY_T	T1	36	12	10	1
BAY	T	BAY_T	T2	46	9	3	6
BAY	T	BAY_T	T3	53	9	3	8
BAY	T	BAY_T	T4	41	12	3	1
BAY	T	BAY_T	T5	48	20	9	1
BAY	T	BAY_T	T6	55	31	5	2
BAY	T	BAY_T	T7	49	19	5	4
BAY	T	BAY_T	T8	59	32	19	3
BAY	T	BAY_T	T10	NA	25	9	1
